# Supplementary material
Source: HighWire-hosted journal article supplement (https://cmaj.ca/highwire/filestream/148983/field_highwire_adjunct_files/2/230108-guide-3-at.pdf)
Supplement: 230108-guide-3-at.pdf [file 230108-guide-3-at.pdf]

### Appendix 3: Organ and Tissue Donation Following Medical Assistance in Dying: Guidance for Policy Meeting Report

English:

<https://professionaleducation.blood.ca/sites/default/files/2023-04/Organ%20and%20Tissue%20Donation%20After%20Medical%20Assistance%20in%20Dying.pdf>

French:

<https://professionaleducation.blood.ca/sites/default/files/2023-04/Don%20d%E2%80%99organes%20et%20de%20tissus%20apr%C3%A8s%20l%E2%80%99aide%20m%C3%A9dicale%20%C3%A0%20mourir%20%20document%20d%E2%80%99orientation.pdf>
